# Supplementary material for: Heteroatom-vacancy centres in molecular nanodiamonds: a computational study of organic molecules possessing triplet ground states through σ-overlap
Source: Royal Society of Chemistry journal article supplement (doi:10.1039/d4cp02667e), 2024-01-01
Supplement: d4cp02667e1.pdf [file d4cp02667e1.pdf]

## Electronic Supporting Information

### Heteroatom-vacancy centres in *molecular* nanodiamonds: A computational study of organic molecules possessing triplet ground states through $\sigma$ -overlap

Colette Maya Macarios,<sup>a</sup> Jiří Pittner,<sup>b</sup> Viki Kumar Prasad,<sup>a,c</sup> and Ulrich Fekl<sup>a,\*</sup>

**Table S1.** Absolute energies obtained via calculations at CAM-B3LYP-D3(BJ)/Def2-QZVPP level of theory.

| Molecule                | Distortion  | Energy (in Hartrees) | Expectation value of total spin-squared operator ( $\langle S^2 \rangle$ ) |
|-------------------------|-------------|----------------------|----------------------------------------------------------------------------|
| NV <sup>-</sup> Singlet | Acute       | -1333.7757381        | -                                                                          |
|                         | Obtuse      | -1333.7574228        | -                                                                          |
| NV <sup>-</sup> Triplet | Undistorted | -1333.7960768        | 2.0259                                                                     |
| OV Singlet              | Acute       | -1354.1386294        | -                                                                          |
|                         | Obtuse      | -1354.1225869        | -                                                                          |
| OV Triplet              | Undistorted | -1354.1634571        | 2.0241                                                                     |
| SV Singlet              | Acute       | -1677.1128211        | -                                                                          |
|                         | Obtuse      | -1677.1040611        | -                                                                          |
| SV Triplet              | Undistorted | -1677.1412177        | 2.0230                                                                     |

**Table S2.** Computed values for the nine molecules considered in this work with various methods.

|                                                                                            | NV <sup>-</sup><br>Triplet<br>Undis-<br>torted | NV <sup>-</sup><br>Singlet<br>Acute | NV <sup>-</sup><br>Singlet<br>Obtuse | OV<br>Triplet<br>Undis-<br>torted | OV<br>Singlet<br>Acute | OV<br>Singlet<br>Obtuse | SV<br>Triplet<br>Undis-<br>torted | SV<br>Singlet<br>Acute | SV<br>Singlet<br>Obtuse |
|--------------------------------------------------------------------------------------------|------------------------------------------------|-------------------------------------|--------------------------------------|-----------------------------------|------------------------|-------------------------|-----------------------------------|------------------------|-------------------------|
| <b>E/a.u.</b> from<br>CAM-B3LYP-<br>D3BJ/Def2-<br>QZVPP                                    | -1333.<br>796076<br>76                         | 1333.<br>775738<br>12               | -1333.<br>757422<br>84               | -1354.<br>163404<br>98            | -1354.<br>138629<br>42 | -1354.<br>122586<br>86  | -1677.<br>141217<br>65            | -1677.<br>112821<br>10 | -1677.<br>104061<br>06  |
| $\Delta E_{S-T}$ (kcal<br>mol <sup>-1</sup> )<br>from<br>CAM-B3LYP-<br>D3BJ/Def2-<br>QZVPP | 0                                              | 12.76                               | 24.26                                | 0                                 | 15.55                  | 25.62                   | 0                                 | 17.82                  | 23.32                   |
| <b>E/a.u.</b> from<br>PBE/PBE-<br>D3BJ/Def2-<br>QZVPP                                      | -1332.<br>828899<br>16                         | -1332.<br>809456<br>65              | -1332.<br>810802<br>63               | -1353.<br>174848<br>54            | -1353.<br>154078<br>34 | -1353.<br>154725<br>96  | -1676.<br>047478<br>55            | -1676.<br>020303<br>22 | -1676.<br>034031<br>54  |
| $\Delta E_{S-T}$ (kcal<br>mol <sup>-1</sup> )<br>from PBE/PBE-<br>D3BJ/Def2-<br>QZVPP      | 0                                              | 12.20                               | 11.35                                | 0                                 | 13.03                  | 12.62                   | 0                                 | 17.05                  | 8.44                    |
| <b>E/a.u.</b> from<br>BP86-<br>D3BJ/Def2-<br>QZVPP                                         | -1334.<br>618695<br>01                         | -1334.<br>597822<br>63              | -1334.<br>600493<br>70               | -1354.<br>977401<br>73            | -1354.<br>954986<br>03 | -1354.<br>957164<br>67  | -1677.<br>990298<br>07            | -1677.<br>961376<br>58 | -1677.<br>976586<br>10  |
| $\Delta E_{S-T}$ (kcal<br>mol <sup>-1</sup> )<br>from BP86-<br>D3BJ/Def2-<br>QZVPP         | 0                                              | 13.10                               | 11.42                                | 0                                 | 14.07                  | 12.70                   | 0                                 | 18.15                  | 8.60                    |
| <b>E/a.u.</b> from<br>M06-2X/Def2-<br>QZVPP                                                | -1333.<br>942205<br>38                         | -1333.<br>932203<br>39              | -1333.<br>911800<br>53               | -1354.<br>302719<br>75            | -1354.<br>288285<br>16 | -1354.<br>270089<br>82  | -1677.<br>255916<br>17            | -1677.<br>237430<br>00 | -1677.<br>225840<br>03  |
| $\Delta E_{S-T}$ (kcal<br>mol <sup>-1</sup> )<br>from M06-<br>2X/Def2-QZVPP                | 0                                              | 6.28                                | 19.08                                | 0                                 | 9.06                   | 20.48                   | 0                                 | 11.60                  | 18.87                   |
| <b>E/a.u.</b> from LC-<br>wPBE-<br>D3BJ/Def2-<br>QZVPP                                     | -1333.<br>746685<br>20                         | -1333.<br>740758<br>36              | -1333.<br>702108<br>53               | -1354.<br>103530<br>50            | -1354.<br>091751<br>34 | -1354.<br>057191<br>40  | -1676.<br>990472<br>04            | -1676.<br>975607<br>48 | -1676.<br>946636<br>86  |
| $\Delta E_{S-T}$ (kcal<br>mol <sup>-1</sup> )                                              | 0                                              | 3.72                                | 27.97                                | 0                                 | 7.39                   | 29.08                   | 0                                 | 9.33                   | 27.51                   |

|                                                                                 |                    |                    |                    |                    |                    |                    |                    |                    |                    |
|---------------------------------------------------------------------------------|--------------------|--------------------|--------------------|--------------------|--------------------|--------------------|--------------------|--------------------|--------------------|
| from LC-wPBE-D3BJ/Def2-QZVPP                                                    |                    |                    |                    |                    |                    |                    |                    |                    |                    |
| <b>E/a.u.</b> from wB97xD/Def2-QZVPP                                            | -1334.07645411     | -1334.06109208     | -1334.03829846     | -1354.43825883     | -1354.41801185     | -1354.39806360     | -1677.40381301     | -1677.38019304     | -1677.36790715     |
| $\Delta E_{S-T}$ (kcal mol <sup>-1</sup> ) from wB97xD/Def2-QZVPP               | 0                  | 9.64               | 23.94              | 0                  | 12.70              | 25.22              | 0                  | 14.82              | 22.53              |
| <b>E/a.u.</b> from DLPNO-B2PLYP-D3BJ/Def2-TZVPP                                 | -1333.271410158105 | -1333.254905438357 | -1333.253184552526 | -1353.630841090564 | -1353.610705002420 | -1353.610224598034 | -1676.499272029033 | -1676.475362602096 | -1676.487598071272 |
| $\Delta E_{S-T}$ (kcal mol <sup>-1</sup> ) from DLPNO-B2PLYP-D3BJ/Def2-TZVPP    | 0                  | 10.36              | 11.44              | 0                  | 12.64              | 12.94              | 0                  | 15.00              | 7.33               |
| <b>E/a.u.</b> from DLPNO-DSDPBEP86-D3BJ/Def2-TZVPP                              | -1331.910934894611 | -1331.904361066435 | -1331.897079699419 | -1352.255455252912 | -1352.244449630160 | -1352.238825214667 | -1675.008289709208 | -1674.994233003239 | -1675.002108017921 |
| $\Delta E_{S-T}$ (kcal mol <sup>-1</sup> ) from DLPNO-DSDPBEP86-D3BJ/Def2-TZVPP | 0                  | 4.13               | 8.69               | 0                  | 6.91               | 10.44              | 0                  | 8.83               | 3.88               |
| <b>E/a.u.</b> from DLPNO-MP2/Def2-TZVPP                                         | -1331.092609554506 | -1331.101418877071 | -1331.098389247544 | -1351.432365975085 | -1351.436313911024 | -1351.434503495475 | -1674.008350358706 | -1674.028492306509 | -1674.043950508383 |
| $\Delta E_{S-T}$ (kcal mol <sup>-1</sup> ) from DLPNO-MP2/Def2-TZVPP            | 0                  | -5.53              | -3.63              | 0                  | -2.48              | -1.34              | 0                  | -12.64             | -22.34             |
| <b>E/a.u.</b> from DMRG(22,37)M=512                                             | -1325.40107272     | -1325.40027225     | -1325.38661139     | -1345.74187827     | -1345.74009336     | -1345.72721404     | -1668.3522211      | -1668.35759471     | -1668.35022007     |
| $\Delta E_{S-T}$ (kcal mol <sup>-1</sup> ) from                                 | 0                  | 0.50               | 9.07               | 0                  | 1.12               | 9.20               | 0                  | -3.37              | 1.26               |

|                                                                                          |                            |                             |                            |                             |                                                  |                                                  |                            |                                                  |                                |
|------------------------------------------------------------------------------------------|----------------------------|-----------------------------|----------------------------|-----------------------------|--------------------------------------------------|--------------------------------------------------|----------------------------|--------------------------------------------------|--------------------------------|
| DMRG(22,37)M<br>=512                                                                     |                            |                             |                            |                             |                                                  |                                                  |                            |                                                  |                                |
| <b>E/a.u.</b> from SF-TDDFT CAM-B3LYP-D3BJ/Def2-QZVPP                                    | -<br>1333.7<br>972134<br>8 | -<br>1333.7<br>653217<br>20 | -<br>1333.7<br>500452<br>3 | -<br>1354.1<br>645053<br>96 | Referen<br>ce<br>triplet<br>not<br>conver<br>ged | Referen<br>ce<br>triplet<br>not<br>conver<br>ged | -<br>1677.1<br>423941<br>2 | Referen<br>ce<br>triplet<br>not<br>conver<br>ged | -<br>1677.0<br>971117<br>63048 |
| $\Delta E_{S-T}$ (kcal<br>mol <sup>-1</sup> ) from<br>SF-TDDFT CAM-B3LYP-D3BJ/Def2-QZVPP | 0                          | 20.01                       | 29.60                      | ---                         | ---                                              | ---                                              | 0                          | ---                                              | 28.42                          |
| <b>ZPVE/a.u.</b> from<br>CAM-B3LYP-D3(BJ)/Def2-TZVPP                                     | 0.6281<br>81               | 0.6313<br>81                | 0.6280<br>36               | 0.6313<br>16                | 0.6337<br>79                                     | 0.6309<br>87                                     | 0.6250<br>93               | 0.6286<br>00                                     | 0.6254<br>97                   |

## XYZ file information of 9 computed molecules

### NV Acute Distortion Singlet

70

-1 1

|   |           |           |           |
|---|-----------|-----------|-----------|
| C | 1.908527  | -1.119644 | 1.157992  |
| H | 2.428255  | -0.985759 | 2.113591  |
| C | 2.879135  | -1.060028 | 0.000000  |
| H | 3.593909  | -1.887203 | 0.000000  |
| C | 0.977446  | 0.071560  | 0.912724  |
| C | 1.908526  | -1.119645 | -1.157992 |
| H | 2.428254  | -0.985762 | -2.113591 |
| C | 0.977446  | 0.071559  | -0.912725 |
| C | 1.706884  | 1.401092  | -1.158011 |
| H | 2.237835  | 1.364074  | -2.114390 |
| C | 3.626426  | 0.291107  | -0.000001 |
| H | 4.275928  | 0.345502  | 0.877941  |
| H | 4.275928  | 0.345501  | -0.877945 |
| C | 1.706885  | 1.401093  | 1.158008  |
| H | 2.237836  | 1.364077  | 2.114387  |
| C | 2.672079  | 1.504490  | -0.000002 |
| H | 3.243853  | 2.437843  | -0.000003 |
| C | 1.093356  | -2.428145 | 1.225391  |
| H | 1.803386  | -3.263396 | 1.247304  |
| C | -1.026524 | -1.720802 | 0.000002  |
| C | 1.093355  | -2.428147 | -1.225389 |
| H | 1.803385  | -3.263397 | -1.247300 |
| C | 0.180586  | -2.610954 | 0.000002  |
| H | -0.076556 | -3.714247 | 0.000003  |
| C | 0.679486  | 2.550762  | 1.220647  |
| H | 1.220553  | 3.501366  | 1.198531  |
| N | -1.218312 | 1.453335  | -0.000001 |
| C | 0.679485  | 2.550760  | -1.220651 |
| H | 1.220553  | 3.501364  | -1.198537 |
| C | -0.251789 | 2.552550  | -0.000002 |
| H | -0.783302 | 3.526968  | -0.000002 |
| C | -1.752019 | -1.470717 | -1.255262 |
| H | -2.466241 | -2.297390 | -1.573557 |

|   |           |           |           |
|---|-----------|-----------|-----------|
| C | -0.001538 | -0.005746 | -2.150120 |
| H | 0.725693  | 0.061311  | -2.969473 |
| C | 0.228303  | -2.457267 | -2.466458 |
| H | -0.311024 | -3.407132 | -2.520815 |
| H | 0.836278  | -2.371337 | -3.373551 |
| C | -0.750953 | -1.303758 | -2.381433 |
| H | -1.282070 | -1.216219 | -3.337347 |
| C | -2.660283 | -0.208530 | -1.208675 |
| C | -0.944550 | 1.163675  | -2.363881 |
| C | -1.931120 | 1.160836  | -1.220627 |
| H | -2.713867 | 1.927648  | -1.410088 |
| C | -0.166625 | 2.456752  | -2.468573 |
| H | 0.455555  | 2.455067  | -3.367088 |
| H | -0.841922 | 3.314563  | -2.536553 |
| H | -3.265985 | -0.214620 | -2.122382 |
| H | -1.496600 | 0.989936  | -3.289862 |
| C | -0.001536 | -0.005743 | 2.150120  |
| C | -1.752018 | -1.470715 | 1.255265  |
| C | -1.931119 | 1.160838  | 1.220627  |
| C | -0.166623 | 2.456755  | 2.468569  |
| H | -0.841921 | 3.314566  | 2.536548  |
| H | 0.455557  | 2.455072  | 3.367085  |
| C | 0.228304  | -2.457264 | 2.466461  |
| H | 0.836280  | -2.371332 | 3.373554  |
| H | -0.311022 | -3.407129 | 2.520820  |
| C | -3.562423 | -0.286220 | 0.000001  |
| H | -4.290931 | 0.531725  | 0.000001  |
| H | -4.118317 | -1.227103 | 0.000002  |
| C | -2.660282 | -0.208528 | 1.208677  |
| C | -0.750952 | -1.303755 | 2.381435  |
| C | -0.944549 | 1.163678  | 2.363880  |
| H | -1.496598 | 0.989940  | 3.289862  |
| H | -1.282068 | -1.216214 | 3.337350  |
| H | 0.725695  | 0.061316  | 2.969473  |
| H | -2.713866 | 1.927650  | 1.410087  |
| H | -2.466241 | -2.297388 | 1.573562  |
| H | -3.265984 | -0.214617 | 2.122384  |

## NV Obtuse Distortion Singlet

70

-1 1

|   |           |           |           |
|---|-----------|-----------|-----------|
| C | -0.930936 | 2.008420  | 1.292859  |
| H | -1.509068 | 2.477706  | 2.129769  |
| C | -1.689037 | 2.377017  | 0.000000  |
| H | -1.812656 | 3.465416  | 0.000000  |
| C | -0.811450 | 0.536605  | 1.487577  |
| C | -0.930936 | 2.008420  | -1.292859 |
| H | -1.509068 | 2.477706  | -2.129769 |
| C | -0.811450 | 0.536605  | -1.487577 |
| C | -2.082885 | -0.223928 | -1.249292 |
| H | -2.765285 | -0.008972 | -2.110788 |
| C | -3.046970 | 1.713157  | 0.000000  |
| H | -3.618606 | 2.014041  | 0.883781  |
| H | -3.618606 | 2.014041  | -0.883781 |
| C | -2.082885 | -0.223928 | 1.249292  |
| H | -2.765285 | -0.008972 | 2.110788  |
| C | -2.836748 | 0.215580  | 0.000000  |
| H | -3.810740 | -0.287194 | -0.000000 |
| C | 0.446723  | 2.659441  | 1.280719  |
| H | 0.341441  | 3.749457  | 1.289527  |
| C | 1.310124  | 0.740608  | 0.000000  |
| C | 0.446723  | 2.659441  | -1.280719 |
| H | 0.341441  | 3.749457  | -1.289527 |
| C | 1.159838  | 2.226033  | 0.000000  |
| H | 2.167072  | 2.676694  | 0.000000  |
| C | -1.922706 | -1.747775 | 1.247922  |
| H | -2.922938 | -2.190689 | 1.218210  |
| N | 0.192256  | -1.841763 | -0.000000 |
| C | -1.922706 | -1.747775 | -1.247922 |
| H | -2.922938 | -2.190689 | -1.218210 |
| C | -1.189737 | -2.248864 | -0.000000 |
| H | -1.267906 | -3.360552 | -0.000000 |
| C | 2.037166  | 0.234373  | -1.231188 |
| H | 3.040414  | 0.695157  | -1.193536 |
| C | 0.015514  | 0.011207  | -2.587791 |

|   |           |           |           |
|---|-----------|-----------|-----------|
| H | -0.418885 | 0.214805  | -3.602450 |
| C | 1.229023  | 2.209789  | -2.512204 |
| H | 2.216261  | 2.680111  | -2.528276 |
| H | 0.703699  | 2.533149  | -3.414939 |
| C | 1.378412  | 0.690432  | -2.519882 |
| H | 1.996288  | 0.385695  | -3.371590 |
| C | 2.256988  | -1.278068 | -1.214614 |
| C | 0.154076  | -1.527084 | -2.487999 |
| C | 0.921685  | -2.010730 | -1.241981 |
| H | 1.138191  | -3.089074 | -1.412427 |
| C | -1.208157 | -2.183332 | -2.507748 |
| H | -1.772830 | -1.874207 | -3.390579 |
| H | -1.108866 | -3.272486 | -2.541936 |
| H | 2.792003  | -1.555177 | -2.126880 |
| H | 0.741138  | -1.865376 | -3.347778 |
| C | 0.015514  | 0.011207  | 2.587791  |
| C | 2.037166  | 0.234373  | 1.231188  |
| C | 0.921685  | -2.010730 | 1.241981  |
| C | -1.208157 | -2.183332 | 2.507748  |
| H | -1.108866 | -3.272486 | 2.541936  |
| H | -1.772830 | -1.874207 | 3.390579  |
| C | 1.229023  | 2.209789  | 2.512204  |
| H | 0.703699  | 2.533149  | 3.414939  |
| H | 2.216261  | 2.680111  | 2.528276  |
| C | 3.059750  | -1.686643 | -0.000000 |
| H | 3.230807  | -2.766927 | -0.000000 |
| H | 4.036967  | -1.196920 | -0.000000 |
| C | 2.256988  | -1.278068 | 1.214614  |
| C | 1.378412  | 0.690432  | 2.519882  |
| C | 0.154076  | -1.527084 | 2.487999  |
| H | 0.741138  | -1.865376 | 3.347778  |
| H | 1.996288  | 0.385695  | 3.371590  |
| H | -0.418885 | 0.214805  | 3.602450  |
| H | 1.138191  | -3.089074 | 1.412427  |
| H | 3.040414  | 0.695157  | 1.193536  |
| H | 2.792003  | -1.555177 | 2.126880  |



## NV Triplet

70

-1 3

|   |           |           |           |
|---|-----------|-----------|-----------|
| C | -0.729946 | 2.097159  | 1.266109  |
| H | -1.222444 | 2.619731  | 2.119483  |
| C | -1.454974 | 2.567315  | -0.000000 |
| H | -1.464765 | 3.662960  | -0.000000 |
| C | -0.833068 | 0.624126  | 1.443569  |
| C | -0.729946 | 2.097159  | -1.266109 |
| H | -1.222444 | 2.619731  | -2.119483 |
| C | -0.833068 | 0.624126  | -1.443569 |
| C | -2.176908 | 0.006321  | -1.251258 |
| H | -2.830563 | 0.276661  | -2.113557 |
| C | -2.886121 | 2.051373  | -0.000000 |
| H | -3.418755 | 2.421698  | 0.880841  |
| H | -3.418755 | 2.421698  | -0.880841 |
| C | -2.176908 | 0.006321  | 1.251258  |
| H | -2.830563 | 0.276661  | 2.113557  |
| C | -2.877650 | 0.530273  | -0.000000 |
| H | -3.909895 | 0.161118  | -0.000000 |
| C | 0.729368  | 2.566314  | 1.261189  |
| H | 0.735138  | 3.661940  | 1.270321  |
| C | 1.667009  | 0.622802  | -0.000000 |
| C | 0.729368  | 2.566314  | -1.261189 |
| H | 0.735138  | 3.661940  | -1.270321 |
| C | 1.462858  | 2.096096  | -0.000000 |
| H | 2.448607  | 2.617804  | -0.000000 |
| C | -2.123651 | -1.528034 | 1.242648  |
| H | -3.151833 | -1.900898 | 1.205228  |
| N | -0.000986 | -1.811806 | 0.000000  |
| C | -2.123651 | -1.528034 | -1.242648 |
| H | -3.151833 | -1.900898 | -1.205228 |
| C | -1.421153 | -2.083844 | 0.000000  |
| H | -1.596923 | -3.184347 | 0.000000  |
| C | 2.172124  | 0.004107  | -1.259563 |
| H | 3.245938  | 0.273557  | -1.394579 |
| C | 0.004850  | 0.005261  | -2.510989 |

|   |           |           |           |
|---|-----------|-----------|-----------|
| H | -0.414775 | 0.275484  | -3.508397 |
| C | 1.444673  | 2.049071  | -2.500306 |
| H | 2.474121  | 2.418571  | -2.521254 |
| H | 0.948597  | 2.419382  | -3.402259 |
| C | 1.439255  | 0.527962  | -2.492352 |
| H | 1.955136  | 0.158054  | -3.386124 |
| C | 2.136866  | -1.530201 | -1.217150 |
| C | -0.015497 | -1.529140 | -2.459882 |
| C | 0.709023  | -2.084800 | -1.229867 |
| H | 0.796013  | -3.185450 | -1.381517 |
| C | -1.441068 | -2.034751 | -2.494250 |
| H | -1.956184 | -1.670365 | -3.386781 |
| H | -1.459291 | -3.128335 | -2.524859 |
| H | 2.618236  | -1.903762 | -2.126165 |
| H | 0.530682  | -1.902830 | -3.331454 |
| C | 0.004850  | 0.005261  | 2.510989  |
| C | 2.172124  | 0.004107  | 1.259563  |
| C | 0.709023  | -2.084800 | 1.229867  |
| C | -1.441068 | -2.034751 | 2.494250  |
| H | -1.459291 | -3.128335 | 2.524859  |
| H | -1.956184 | -1.670365 | 3.386781  |
| C | 1.444673  | 2.049071  | 2.500306  |
| H | 0.948597  | 2.419382  | 3.402259  |
| H | 2.474121  | 2.418571  | 2.521254  |
| C | 2.879038  | -2.037064 | 0.000000  |
| H | 2.913670  | -3.130676 | 0.000000  |
| H | 3.909871  | -1.673548 | 0.000000  |
| C | 2.136866  | -1.530201 | 1.217150  |
| C | 1.439255  | 0.527962  | 2.492352  |
| C | -0.015497 | -1.529140 | 2.459882  |
| H | 0.530682  | -1.902830 | 3.331454  |
| H | 1.955136  | 0.158054  | 3.386124  |
| H | -0.414775 | 0.275484  | 3.508397  |
| H | 0.796013  | -3.185450 | 1.381517  |
| H | 3.245938  | 0.273557  | 1.394579  |
| H | 2.618236  | -1.903762 | 2.126165  |

### OV Acute Distortion Singlet

70

0 1

|   |           |           |           |
|---|-----------|-----------|-----------|
| C | -1.855153 | 1.218308  | 1.158970  |
| H | -2.382306 | 1.113420  | 2.112895  |
| C | -2.826437 | 1.207178  | 0.000000  |
| H | -3.496259 | 2.068343  | 0.000000  |
| C | -0.991585 | -0.021171 | 0.919934  |
| C | -1.855152 | 1.218310  | -1.158970 |
| H | -2.382305 | 1.113423  | -2.112895 |
| C | -0.991584 | -0.021169 | -0.919935 |
| C | -1.792007 | -1.308127 | -1.162266 |
| H | -2.320754 | -1.252073 | -2.116173 |
| C | -3.644419 | -0.101813 | -0.000001 |
| H | -4.295634 | -0.123407 | 0.876064  |
| H | -4.295634 | -0.123405 | -0.876067 |
| C | -1.792008 | -1.308129 | 1.162263  |
| H | -2.320755 | -1.252076 | 2.116170  |
| C | -2.757237 | -1.364902 | -0.000002 |
| H | -3.377167 | -2.265211 | -0.000003 |
| C | -0.970898 | 2.481058  | 1.225388  |
| H | -1.636946 | 3.348848  | 1.247447  |
| C | 1.104059  | 1.635284  | 0.000001  |
| C | -0.970897 | 2.481060  | -1.225385 |
| H | -1.636945 | 3.348850  | -1.247444 |
| C | -0.051914 | 2.610768  | 0.000002  |
| H | 0.281842  | 3.679432  | 0.000002  |
| C | -0.820830 | -2.505040 | 1.230379  |
| H | -1.396094 | -3.433987 | 1.205051  |
| O | 1.114831  | -1.471867 | -0.000001 |
| C | -0.820829 | -2.505038 | -1.230382 |
| H | -1.396094 | -3.433985 | -1.205056 |
| C | 0.063344  | -2.582047 | -0.000002 |
| H | 0.658992  | -3.496238 | -0.000002 |
| C | 1.827119  | 1.389341  | -1.261005 |
| H | 2.574702  | 2.177043  | -1.574331 |
| C | -0.004488 | 0.013844  | -2.152553 |

|   |           |           |           |
|---|-----------|-----------|-----------|
| H | -0.726510 | -0.022648 | -2.975162 |
| C | -0.106842 | 2.469551  | -2.467955 |
| H | 0.477754  | 3.390118  | -2.523903 |
| H | -0.716778 | 2.414630  | -3.374076 |
| C | 0.814990  | 1.269637  | -2.385950 |
| H | 1.334740  | 1.154247  | -3.344124 |
| C | 2.675355  | 0.092877  | -1.210255 |
| C | 0.878561  | -1.201828 | -2.364739 |
| C | 1.888494  | -1.221758 | -1.260366 |
| H | 2.578197  | -2.068379 | -1.327773 |
| C | 0.049118  | -2.462133 | -2.465088 |
| H | -0.563194 | -2.431278 | -3.365310 |
| H | 0.678424  | -3.353289 | -2.528405 |
| H | 3.284769  | 0.047021  | -2.120557 |
| H | 1.444011  | -1.057510 | -3.285606 |
| C | -0.004490 | 0.013841  | 2.152553  |
| C | 1.827118  | 1.389339  | 1.261007  |
| C | 1.888494  | -1.221760 | 1.260365  |
| C | 0.049117  | -2.462136 | 2.465085  |
| H | 0.678422  | -3.353293 | 2.528400  |
| H | -0.563196 | -2.431283 | 3.365307  |
| C | -0.106844 | 2.469548  | 2.467958  |
| H | -0.716780 | 2.414625  | 3.374078  |
| H | 0.477752  | 3.390114  | 2.523908  |
| C | 3.578792  | 0.114626  | 0.000001  |
| H | 4.270904  | -0.733007 | 0.000001  |
| H | 4.175196  | 1.026960  | 0.000002  |
| C | 2.675355  | 0.092875  | 1.210256  |
| C | 0.814989  | 1.269634  | 2.385952  |
| C | 0.878559  | -1.201832 | 2.364737  |
| H | 1.444009  | -1.057514 | 3.285606  |
| H | 1.334738  | 1.154242  | 3.344126  |
| H | -0.726512 | -0.022653 | 2.975161  |
| H | 2.578196  | -2.068381 | 1.327771  |
| H | 2.574701  | 2.177040  | 1.574335  |
| H | 3.284768  | 0.047018  | 2.120559  |

## OV Obtuse Distortion Singlet

70

0 1

|   |           |           |           |
|---|-----------|-----------|-----------|
| C | -0.957735 | 1.999555  | 1.293052  |
| H | -1.539815 | 2.451656  | 2.127103  |
| C | -1.720400 | 2.355418  | 0.000000  |
| H | -1.859463 | 3.440275  | 0.000000  |
| C | -0.811726 | 0.523502  | 1.486733  |
| C | -0.957735 | 1.999555  | -1.293052 |
| H | -1.539815 | 2.451656  | -2.127103 |
| C | -0.811726 | 0.523502  | -1.486733 |
| C | -2.085009 | -0.244854 | -1.252807 |
| H | -2.769965 | -0.047100 | -2.109161 |
| C | -3.070731 | 1.676010  | 0.000000  |
| H | -3.647564 | 1.968451  | 0.881262  |
| H | -3.647564 | 1.968451  | -0.881262 |
| C | -2.085009 | -0.244854 | 1.252807  |
| H | -2.769965 | -0.047100 | 2.109161  |
| C | -2.842492 | 0.181228  | 0.000000  |
| H | -3.810391 | -0.332043 | -0.000000 |
| C | 0.410268  | 2.667938  | 1.281145  |
| H | 0.293514  | 3.754758  | 1.287383  |
| C | 1.292710  | 0.756484  | 0.000000  |
| C | 0.410268  | 2.667938  | -1.281145 |
| H | 0.293514  | 3.754758  | -1.287383 |
| C | 1.124905  | 2.241126  | 0.000000  |
| H | 2.127136  | 2.696620  | 0.000000  |
| C | -1.901671 | -1.764472 | 1.254487  |
| H | -2.888392 | -2.232846 | 1.213970  |
| O | 0.210002  | -1.784982 | -0.000000 |
| C | -1.901671 | -1.764472 | -1.254487 |
| H | -2.888392 | -2.232846 | -1.213970 |
| C | -1.204677 | -2.255766 | -0.000000 |
| H | -1.131099 | -3.348368 | -0.000000 |
| C | 2.035839  | 0.272684  | -1.234991 |
| H | 3.030563  | 0.742956  | -1.196608 |
| C | 0.015008  | 0.021826  | -2.602493 |

|   |           |           |           |
|---|-----------|-----------|-----------|
| H | -0.413967 | 0.214248  | -3.614770 |
| C | 1.200084  | 2.233092  | -2.513134 |
| H | 2.179683  | 2.715886  | -2.528594 |
| H | 0.673988  | 2.551186  | -3.415580 |
| C | 1.371864  | 0.716179  | -2.526296 |
| H | 1.997413  | 0.424076  | -3.375477 |
| C | 2.278707  | -1.234463 | -1.214851 |
| C | 0.167164  | -1.512719 | -2.500319 |
| C | 0.968313  | -1.976568 | -1.289394 |
| H | 1.127166  | -3.057604 | -1.339193 |
| C | -1.179544 | -2.200132 | -2.509178 |
| H | -1.750060 | -1.898633 | -3.386916 |
| H | -1.066016 | -3.286839 | -2.548469 |
| H | 2.810916  | -1.516453 | -2.125646 |
| H | 0.764340  | -1.860569 | -3.348237 |
| C | 0.015008  | 0.021826  | 2.602493  |
| C | 2.035839  | 0.272684  | 1.234991  |
| C | 0.968313  | -1.976568 | 1.289394  |
| C | -1.179544 | -2.200132 | 2.509178  |
| H | -1.066016 | -3.286839 | 2.548469  |
| H | -1.750060 | -1.898633 | 3.386916  |
| C | 1.200084  | 2.233092  | 2.513134  |
| H | 0.673988  | 2.551186  | 3.415580  |
| H | 2.179683  | 2.715886  | 2.528594  |
| C | 3.077721  | -1.648584 | -0.000000 |
| H | 3.262201  | -2.725752 | -0.000000 |
| H | 4.047041  | -1.151530 | -0.000000 |
| C | 2.278707  | -1.234463 | 1.214851  |
| C | 1.371864  | 0.716179  | 2.526296  |
| C | 0.167164  | -1.512719 | 2.500319  |
| H | 0.764340  | -1.860569 | 3.348237  |
| H | 1.997413  | 0.424076  | 3.375477  |
| H | -0.413967 | 0.214248  | 3.614770  |
| H | 1.127166  | -3.057604 | 1.339193  |
| H | 3.030563  | 0.742956  | 1.196608  |
| H | 2.810916  | -1.516453 | 2.125646  |

## OV Triplet

70

0 3

|   |           |           |           |
|---|-----------|-----------|-----------|
| C | 0.732656  | 1.262807  | -2.098576 |
| H | 1.226888  | 2.114648  | -2.609370 |
| C | -0.725567 | 1.262874  | -2.568574 |
| H | -0.730431 | 1.271300  | -3.661991 |
| C | 0.833735  | 1.436910  | -0.620755 |
| C | -1.459951 | 0.003095  | -2.098576 |
| H | -2.444782 | 0.005192  | -2.609370 |
| C | -1.661268 | 0.003581  | -0.620755 |
| C | -2.176017 | 1.268872  | -0.014439 |
| H | -3.244827 | 1.406860  | -0.280599 |
| C | -1.439091 | 2.504835  | -2.055514 |
| H | -0.942791 | 3.404859  | -2.425492 |
| H | -2.466623 | 2.529393  | -2.425413 |
| C | -0.000000 | 2.518957  | -0.014424 |
| H | 0.419104  | 3.511804  | -0.280617 |
| C | -1.436640 | 2.500819  | -0.534389 |
| H | -1.950564 | 3.395414  | -0.167577 |
| C | 1.456465  | -0.003077 | -2.568574 |
| H | 1.466194  | -0.003078 | -3.661991 |
| C | 0.827533  | -1.440491 | -0.620755 |
| C | -0.730897 | -1.259797 | -2.568574 |
| H | -0.735762 | -1.268222 | -3.661991 |
| C | 0.727295  | -1.265902 | -2.098576 |
| H | 1.217895  | -2.119840 | -2.609370 |
| C | 0.024540  | 2.467737  | 1.517623  |
| H | -0.523619 | 3.330769  | 1.904238  |
| O | 0.000000  | 0.000000  | 1.755313  |
| C | -2.144077 | 1.221903  | 1.517541  |
| H | -2.613414 | 2.130232  | 1.904065  |
| C | -0.731959 | 1.274179  | 2.067683  |
| H | -0.750452 | 1.306416  | 3.161516  |
| C | -0.010866 | -2.518922 | -0.014439 |
| H | 0.404037  | -3.513532 | -0.280599 |
| C | -2.181481 | -1.259479 | -0.014424 |

|   |           |           |           |
|---|-----------|-----------|-----------|
| H | -3.250864 | -1.392948 | -0.280617 |
| C | -1.449705 | -2.498707 | -2.055514 |
| H | -0.957207 | -3.400855 | -2.425413 |
| H | -2.477299 | -2.518910 | -2.425492 |
| C | -1.447453 | -2.494576 | -0.534389 |
| H | -1.965233 | -3.386944 | -0.167577 |
| C | 0.013839  | -2.467777 | 1.517541  |
| C | -2.149393 | -1.212616 | 1.517623  |
| C | -0.737492 | -1.270984 | 2.067683  |
| H | -0.756163 | -1.303119 | 3.161516  |
| C | -2.879784 | 0.006248  | 2.036655  |
| H | -3.907242 | 0.008456  | 1.674257  |
| H | -2.917548 | 0.006345  | 3.129165  |
| H | -0.538128 | -3.328399 | 1.904065  |
| H | -2.622721 | -2.118852 | 1.904238  |
| C | 2.186884  | 1.250050  | -0.014439 |
| C | 2.181481  | -1.259479 | -0.014424 |
| C | 1.469451  | -0.003194 | 2.067683  |
| C | 1.445303  | 2.490842  | 2.036655  |
| H | 1.464269  | 2.523498  | 3.129165  |
| H | 1.960944  | 3.379542  | 1.674257  |
| C | 2.888797  | -0.006128 | -2.055514 |
| H | 3.423831  | 0.871462  | -2.425413 |
| H | 3.420089  | -0.885949 | -2.425492 |
| C | 1.434481  | -2.497090 | 2.036655  |
| H | 1.453279  | -2.529843 | 3.129165  |
| H | 1.946298  | -3.387998 | 1.674257  |
| C | 2.124853  | -1.255121 | 1.517623  |
| C | 2.884093  | -0.006243 | -0.534389 |
| C | 2.130238  | 1.245874  | 1.517541  |
| H | 3.151542  | 1.198167  | 1.904065  |
| H | 3.915796  | -0.008469 | -0.167577 |
| H | 2.840790  | 2.106672  | -0.280599 |
| H | 1.506615  | -0.003297 | 3.161516  |
| H | 2.831760  | -2.118857 | -0.280617 |
| H | 3.146341  | -1.211917 | 1.904238  |



## SV Acute Distortion Singlet

70

0 1

|   |           |           |           |
|---|-----------|-----------|-----------|
| C | 1.919939  | 1.234185  | -1.166097 |
| H | 2.455983  | 1.136882  | -2.115885 |
| C | 2.885489  | 1.213812  | -0.000197 |
| H | 3.562746  | 2.069455  | -0.000343 |
| C | 1.046055  | 0.003138  | -0.943130 |
| C | 1.920031  | 1.234537  | 1.165769  |
| H | 2.456119  | 1.137480  | 2.115561  |
| C | 1.046138  | 0.003465  | 0.943102  |
| C | 1.834413  | -1.294205 | 1.171760  |
| H | 2.378936  | -1.229631 | 2.117439  |
| C | 3.692724  | -0.100500 | -0.000066 |
| H | 4.343626  | -0.127737 | -0.876124 |
| H | 4.343665  | -0.127530 | 0.875968  |
| C | 1.834359  | -1.294538 | -1.171553 |
| H | 2.378822  | -1.230184 | -2.117283 |
| C | 2.793420  | -1.354139 | 0.000092  |
| H | 3.407070  | -2.258573 | 0.000202  |
| C | 1.040293  | 2.500422  | -1.223431 |
| H | 1.709506  | 3.365576  | -1.224850 |
| C | -1.046072 | 1.632886  | -0.000181 |
| C | 1.040348  | 2.500771  | 1.222779  |
| H | 1.709544  | 3.365938  | 1.223944  |
| C | 0.116495  | 2.612620  | -0.000327 |
| H | -0.239915 | 3.671620  | -0.000475 |
| C | 0.898923  | -2.523581 | -1.273016 |
| H | 1.523364  | -3.413715 | -1.380153 |
| S | -1.101269 | -1.359129 | 0.000186  |
| C | 0.898985  | -2.523224 | 1.273595  |
| H | 1.523432  | -3.413328 | 1.380940  |
| C | 0.069342  | -2.738321 | 0.000340  |
| H | -0.414045 | -3.715598 | 0.000489  |
| C | -1.784934 | 1.475910  | 1.272943  |
| H | -2.465126 | 2.330552  | 1.552575  |
| C | 0.042611  | 0.066731  | 2.182560  |

|   |           |           |           |
|---|-----------|-----------|-----------|
| H | 0.776468  | 0.046266  | 2.995102  |
| C | 0.180745  | 2.520170  | 2.467770  |
| H | -0.382653 | 3.453855  | 2.515617  |
| H | 0.790634  | 2.460002  | 3.373452  |
| C | -0.765895 | 1.339189  | 2.396497  |
| H | -1.286095 | 1.242617  | 3.356057  |
| C | -2.724855 | 0.241744  | 1.279134  |
| C | -0.854825 | -1.130689 | 2.476436  |
| C | -2.014501 | -1.130247 | 1.480096  |
| H | -2.741610 | -1.919384 | 1.672958  |
| C | -0.029225 | -2.422419 | 2.486621  |
| H | 0.575373  | -2.426988 | 3.393052  |
| H | -0.677748 | -3.300799 | 2.537093  |
| H | -3.401836 | 0.333026  | 2.134177  |
| H | -1.281171 | -0.986241 | 3.469845  |
| C | 0.042506  | 0.066121  | -2.182577 |
| C | -1.784981 | 1.475569  | -1.273240 |
| C | -2.014582 | -1.130642 | -1.479732 |
| C | -0.029359 | -2.423092 | -2.486015 |
| H | -0.677889 | -3.301482 | -2.536221 |
| H | 0.575189  | -2.427903 | -3.392479 |
| C | 0.180659  | 2.519498  | -2.468406 |
| H | 0.790522  | 2.459086  | -3.374089 |
| H | -0.382730 | 3.453177  | -2.516483 |
| C | -3.569703 | 0.232474  | 0.000046  |
| H | -4.260989 | -0.616242 | 0.000172  |
| H | -4.180966 | 1.135608  | -0.000059 |
| C | -2.724912 | 0.241408  | -1.279083 |
| C | -0.765988 | 1.338543  | -2.396799 |
| C | -0.854955 | -1.131355 | -2.476127 |
| H | -1.281340 | -0.987150 | -3.469554 |
| H | -1.286225 | 1.241736  | -3.356315 |
| H | 0.776339  | 0.045440  | -2.995135 |
| H | -2.741705 | -1.919826 | -1.672347 |
| H | -2.465177 | 2.330141  | -1.553076 |
| H | -3.401931 | 0.332480  | -2.134118 |

## SV Obtuse Distortion Singlet

70

0 1

|   |           |           |           |
|---|-----------|-----------|-----------|
| C | 1.644215  | 1.490371  | 1.283884  |
| H | 1.903588  | 2.173818  | 2.121165  |
| C | 1.770573  | 2.328468  | -0.000000 |
| H | 2.774650  | 2.761165  | -0.000000 |
| C | 0.263718  | 0.944729  | 1.502660  |
| C | 1.644215  | 1.490371  | -1.283884 |
| H | 1.903588  | 2.173818  | -2.121165 |
| C | 0.263718  | 0.944729  | -1.502660 |
| C | -0.825147 | 1.981346  | -1.275550 |
| H | -0.773139 | 2.706399  | -2.115543 |
| C | 0.746987  | 3.440675  | -0.000000 |
| H | 0.870610  | 4.074993  | 0.880946  |
| H | 0.870610  | 4.074993  | -0.880946 |
| C | -0.825147 | 1.981346  | 1.275550  |
| H | -0.773139 | 2.706399  | 2.115543  |
| C | -0.627078 | 2.808823  | 0.000000  |
| H | -1.387482 | 3.596838  | 0.000000  |
| C | 2.705560  | 0.394436  | 1.280265  |
| H | 3.695039  | 0.857882  | 1.294629  |
| C | 1.258384  | -1.122236 | -0.000000 |
| C | 2.705560  | 0.394436  | -1.280265 |
| H | 3.695039  | 0.857882  | -1.294629 |
| C | 2.570247  | -0.439341 | -0.000000 |
| H | 3.383713  | -1.185682 | -0.000000 |
| C | -2.259447 | 1.436014  | 1.318717  |
| H | -2.949051 | 2.276829  | 1.422719  |
| S | -1.404536 | -0.549189 | 0.000000  |
| C | -2.259447 | 1.436014  | -1.318717 |
| H | -2.949051 | 2.276829  | -1.422719 |
| C | -2.618794 | 0.712470  | 0.000000  |
| H | -3.652295 | 0.358631  | 0.000000  |
| C | 0.942835  | -1.903451 | -1.262983 |
| H | 1.680064  | -2.724367 | -1.297333 |

|   |           |           |           |
|---|-----------|-----------|-----------|
| C | 0.065122  | 0.003810  | -2.630859 |
| H | 0.176600  | 0.487283  | -3.626364 |
| C | 2.534884  | -0.474382 | -2.521881 |
| H | 3.287997  | -1.264806 | -2.542863 |
| H | 2.684756  | 0.132387  | -3.416725 |
| C | 1.139636  | -1.090446 | -2.540014 |
| H | 1.047847  | -1.761231 | -3.399273 |
| C | -0.429591 | -2.596967 | -1.267000 |
| C | -1.362688 | -0.595708 | -2.605555 |
| C | -1.563825 | -1.582046 | -1.440707 |
| H | -2.534767 | -2.077957 | -1.509305 |
| C | -2.420263 | 0.515776  | -2.539022 |
| H | -2.329642 | 1.130790  | -3.434607 |
| H | -3.422457 | 0.079433  | -2.557007 |
| H | -0.463702 | -3.258948 | -2.134671 |
| H | -1.515212 | -1.166696 | -3.523951 |
| C | 0.065122  | 0.003810  | 2.630859  |
| C | 0.942835  | -1.903451 | 1.262983  |
| C | -1.563825 | -1.582046 | 1.440707  |
| C | -2.420263 | 0.515776  | 2.539022  |
| H | -3.422457 | 0.079433  | 2.557007  |
| H | -2.329642 | 1.130790  | 3.434607  |
| C | 2.534884  | -0.474382 | 2.521881  |
| H | 2.684756  | 0.132387  | 3.416725  |
| H | 3.287997  | -1.264806 | 2.542863  |
| C | -0.617276 | -3.431684 | 0.000000  |
| H | -1.601879 | -3.905627 | 0.000000  |
| H | 0.120437  | -4.234746 | -0.000000 |
| C | -0.429591 | -2.596967 | 1.267000  |
| C | 1.139636  | -1.090446 | 2.540014  |
| C | -1.362688 | -0.595708 | 2.605555  |
| H | -1.515212 | -1.166696 | 3.523951  |
| H | 1.047847  | -1.761231 | 3.399273  |
| H | 0.176600  | 0.487283  | 3.626364  |
| H | -2.534767 | -2.077957 | 1.509305  |
| H | 1.680064  | -2.724367 | 1.297333  |
| H | -0.463702 | -3.258948 | 2.134671  |

## SV Triplet

70

0 3

|   |           |           |           |
|---|-----------|-----------|-----------|
| C | 1.267917  | 0.732032  | -2.142050 |
| H | 2.115108  | 1.221158  | -2.666052 |
| C | 0.000000  | 1.454681  | -2.611884 |
| H | 0.000000  | 1.455104  | -3.705151 |
| C | 1.460323  | 0.843118  | -0.666849 |
| C | -1.267917 | 0.732032  | -2.142050 |
| H | -2.115108 | 1.221158  | -2.666052 |
| C | -1.460323 | 0.843118  | -0.666849 |
| C | -1.268958 | 2.210484  | -0.071489 |
| H | -2.114936 | 2.857299  | -0.380587 |
| C | 0.000000  | 2.890810  | -2.112317 |
| H | 0.878517  | 3.420688  | -2.486610 |
| H | -0.878517 | 3.420688  | -2.486610 |
| C | 1.268958  | 2.210484  | -0.071489 |
| H | 2.114936  | 2.857299  | -0.380587 |
| C | 0.000000  | 2.896190  | -0.591707 |
| H | 0.000000  | 3.930616  | -0.233012 |
| C | 1.259791  | -0.727341 | -2.611884 |
| H | 1.260157  | -0.727552 | -3.705151 |
| C | -0.000000 | -1.686236 | -0.666849 |
| C | -1.259791 | -0.727341 | -2.611884 |
| H | -1.260157 | -0.727552 | -3.705151 |
| C | -0.000000 | -1.464065 | -2.142050 |
| H | -0.000000 | -2.442317 | -2.666052 |
| C | 1.302645  | 2.228886  | 1.468673  |
| H | 1.385255  | 3.268126  | 1.793888  |
| S | 0.000000  | 0.000000  | 1.574658  |
| C | -1.302645 | 2.228886  | 1.468673  |
| H | -1.385255 | 3.268126  | 1.793888  |
| C | 0.000000  | 1.688620  | 2.087047  |
| H | 0.000000  | 1.809774  | 3.172443  |
| C | -1.279856 | -2.204192 | -0.071489 |
| H | -1.417026 | -3.260238 | -0.380587 |

|   |           |           |           |
|---|-----------|-----------|-----------|
| C | -2.548814 | -0.006292 | -0.071489 |
| H | -3.531962 | 0.402939  | -0.380587 |
| C | -2.503515 | -1.445405 | -2.112317 |
| H | -2.523145 | -2.471162 | -2.486610 |
| H | -3.401662 | -0.949526 | -2.486610 |
| C | -2.508174 | -1.448095 | -0.591707 |
| H | -3.404014 | -1.965308 | -0.233012 |
| C | -1.278949 | -2.242566 | 1.468673  |
| C | -2.581594 | 0.013681  | 1.468673  |
| C | -1.462388 | -0.844310 | 2.087047  |
| H | -1.567310 | -0.904887 | 3.172443  |
| C | -2.522933 | 1.456616  | 1.985576  |
| H | -3.420798 | 1.974999  | 1.648450  |
| H | -2.543975 | 1.468765  | 3.078664  |
| H | -2.137653 | -2.833729 | 1.793888  |
| H | -3.522908 | -0.434397 | 1.793888  |
| C | 2.548814  | -0.006292 | -0.071489 |
| C | 1.279856  | -2.204192 | -0.071489 |
| C | 1.462388  | -0.844310 | 2.087047  |
| C | 2.522933  | 1.456616  | 1.985576  |
| H | 2.543975  | 1.468765  | 3.078664  |
| H | 3.420798  | 1.974999  | 1.648450  |
| C | 2.503515  | -1.445405 | -2.112317 |
| H | 3.401662  | -0.949526 | -2.486610 |
| H | 2.523145  | -2.471162 | -2.486610 |
| C | -0.000000 | -2.913232 | 1.985576  |
| H | -0.000000 | -2.937530 | 3.078664  |
| H | -0.000000 | -3.949997 | 1.648450  |
| C | 1.278949  | -2.242566 | 1.468673  |
| C | 2.508174  | -1.448095 | -0.591707 |
| C | 2.581594  | 0.013681  | 1.468673  |
| H | 3.522908  | -0.434397 | 1.793888  |
| H | 3.404014  | -1.965308 | -0.233012 |
| H | 3.531962  | 0.402939  | -0.380587 |
| H | 1.567310  | -0.904887 | 3.172443  |
| H | 1.417026  | -3.260238 | -0.380587 |
| H | 2.137653  | -2.833729 | 1.793888  |
